# Supplementary material for: Relief of autoinhibition by conformational switch explains enzyme activation by a catalytically dead paralog
Source: PubMed Central journal article supplement (PMC5201418; doi:10.7554/elife.20198), 2016-12-15
Supplement: elife-20198-supp2.pdf [file elife-20198-supp2.pdf]

Trypanosomatids Prozyme:

72390539 *Trypanosoma brucei* TREU927 -----MSVTRINQQTECPSSVHDLVSCWGGCTQSKT---STDSGLEKRFELNFAQPV----  
 71408277 *Trypanosoma cruzi* CL Brener -----MLESTWAAAREEVPEVSHALMAMWGGFDGPRN---ANDCGIEKRLELDFRGI----  
 157872786 *Leishmania major* Friedlin\* -----MPTNSWASSRDVFPESVRALMSLWGGFVNPTS---YSDSGLEKRLELDFFAAV----  
 154341969 *Leishmania braziliensis*\* -----MPPHSWASPRDVFPEVSHALMSLWGGFANPTN---YNDSGLEKRLELDFDTSV----  
 588319214 *Phytomonas sp. isolate\_EM1* -----MPSWTCRDEYPPQSVHALMSLWGGFAPLPE---VSDSGLEKRLELDFKFFC----  
 528258165 *Angomonas deanei* -----MTSWASPRDVYPPSVHDLMSLWGGFDSTAPN---SDNGLEKRFEVDFARHV----  
 528251074 *Strigomonas culicis*\* -----MTSWASPRDAYPSSVHALMSLWGGFDSTAPG---SDSGLEKRFEVDFFAQPI----

Trypanosomatids:

72390527 *Trypanosoma brucei* TREU927 -----MSSC-KDSL-SLMAMWGS IARFDPKHERSEFEGPEKRLEIVIMRVVDG---  
 71408275 *Trypanosoma cruzi* CL Brener -----MLSN-KDPL-SLMAMWGSVKGYDPNQGASEFEGPEKRLEIVIMRIIDE---  
 157872783 *Leishmania major* Friedlin -----MNVCSNNT-KDPL-TLMAMWGS MKGYNPEQGFSEFEGPEKRLEIVILRSTLE---  
 154341967 *Leishmania braziliensis* -----MNVSLNTT-KDPL-TLMAMWGS MKRYNPEQGFSEFEGPEKRLEIVILRSTLE---  
 588319215 *Phytomonas sp. isolate\_EM1* -----MSS-KDPV-TLMAMWGS MKDYNPDQGFSEFEGPEKRLEIVIRFLPE---  
 528270660 *Angomonas deanei* -----MS-SSCN-KDPL-TLMAMWGS MRGYNPDQGFSEFEGPEKRLEIVIRFLDE---  
 529494686 *Strigomonas culicis* -----MSVSSPST-KDPL-TLMAMWGS MRGYNPEQGFSEFEGPEKRLEIVIRFLDE---

protists:

831777486 *Acytostelium subglobosum* LB1 --MPIMTTN-KTFNESDAGF-----EVEEQCFPGGFEFEGPEKKLDIRFHPIN[5]Q  
 166240588 *Dictyostelium discoideum* AX4 --MPILST--EIFNEADAGFV-----YQSNNDYSDGFEFEGPEKKLDIRFGPIS[9]S  
 330840910 *Dictyostelium purpureum* --MPIMST--EIFNESDAGFV-----IBSTQNCYADGFEFEGPEKKLDIRFCPIN[6]S  
 470246992 *Dictyostelium fasciculatum* --MPIMSSQ-KIFNEAAGFAHCI[5]NNTTTP[8]QEDQETFPGGFEFEGPEKKLDIRFCISKY[4]S  
 290984948 *Naegleria gruberi* NEG-M NGKPIILVN--YAEKHVKHVDC-----ECCAEAGFEFEGPEKRLELDFRPIA[22]  
 676381665 *Aureococcus anophagefferens* -----MDESSVPESVGVFEFEGPEKTLVVCFLPGV----  
 813169519 *Saprolegnia parasitica* IDQAI PDSTNNVSSDTASSTDS-----RGDQPV-----MDYPNTEFEGPEKNLEVDLVPACD--G  
 673049047 *Aphanomyces invadans* -MPTTDDMKTTAASATA-STDSCS-----NCSDTPA-----TVDYPNTEFEGPEKNLEIDFTPA----  
 675188663 *Phytophthora parasitica* MAQPFPEPIKLHDETS-STQS-----EASDT-----VPNTEFEGPEKNLEIDFKLVG----  
 294883519 *Perkinsus marinus* -MYDFPTQGGPMASDIKQLMREERRDSQEDS-----QEPTEFEGTEKRIEIDFVWSGE---  
 551667574 *Guillardia theta* -----MPEI IETNQLFCFEFEGSEKKMEIDFRPID[6]I

fungi:

629651635 *Eutypa lata* -----MVNLAIPSDYTFSPSE--GTPHLTINHDVA--ADLD-STNAEFEGPEKLLVWFVAPGP[5]S  
 261202444 *Blastomyces gilchristii* -----MVNIEILKNYTASPSSFMGTSSLTINHEAT--LDLD-SSTADEFEGPEKLLVWFVGPSP[5]S  
 50553544 *Yarrowia lipolytica* -----MILEHHVNHQVA--VDLD-SAEAFEGPEKLLVWFVAPNQESLE  
 891574827 *Schizosaccharomyces cryophilus* -----MSPILVVDQENA--QEFN-SS-SFEGPEKLLVWFVAPNP[6]G  
 6324521 *Saccharomyces cerevisiae* -----MTVTIKELTNHNYIDHELSS--ATLD-STDAEFEGPEKLLVWFVPHKKSII-  
 444315950 *Tetrapisispora blattae* -----MSASTIPQETTSFIDYEKS--NNLD-STDAEFEGPEKLLVWFVYPET[6]A  
 149237635 *Lodderomyces elongisporus* -----M-----VSPPAY--HQDSFVDHELSS--KNLD-STYAFEGPEKLLVWFVWKSE[5]C  
 953449703 *Mixia osmundae* GHSHTNLPLARQHAKHDDHFDPPHHENKANDSGVE--ILQDSAPGFEFEGPEKLLVWFVAPSE[25]  
 331247566 *Puccinia graminis* -----MVTVCVLTKDSTSG--AEPAN-NGPPEFEGPEKLLVWFVAPSA[19]  
 955498480 *Moesziomyces antarcticus* QRIKSLEIMDARAELLRSKFQDDASSIITAVDSNSG[8]FHD-PCGPFEFEGPEKLLVWFVFAEEP[14]  
 914974225 *Tilletiaria anomala* -----MTATTS SQLKSTKEQE--DWME-AQGPFEFEGPEKLLVWFVFAEGP[22]

animals:

74275346 *Homo sapiens* -----MEA-AHFFEGTEKLLVWFVSRQPPDAN  
 936678339 *Trichogramma pretiosum* --MMSMEEEGNKKKLEQQQGS DSDVEAGA-----EIMS-VQFFEGVEKLLVWFVSTNV[21]  
 157115295 *Aedes aegypti* --MAE-----NEDLSNSS--SSSSSR-----ED-MHFFEGVEKLLVWFVFE---PNPS  
 24583360 *Drosophila melanogaster* --MLE-----NG-SHFFEGVEKLLVWFVFESS----  
 910327857 *Papilio xuthus* --MAE-----TEIISNSE-----SN-DQFFEGVEKLLVWFVFT---P  
 871243907 *Aplysia californica* CIMAS-----AA-SNECFEGTEKLLVWFVSSSH---P  
 675851988 *Helobdella robusta* --MKN---IE-----PGSHCTISVVEDPLHEGEYFEGTEKLLVWFVSPSS[8]Q  
 156370797 *Nematostella vectensis* --MCE-----VGFFEGPEKLLVWFVWRPTL[15]  
 761906225 *Amphimedon queenslandica* --MED-----TNADLSRPAEPHPAADLSRRFSIEEVGFEGTEKLLVWFVFD--IPSPE  
 198416848 *Ciona intestinalis* --MSV---VD-----VKDGAP-----QSWFEGVEKLLVWFVSSSA--PD  
 268561468 *Caenorhabditis briggsae* --MSA-----TATICS-EKNFAVQTHPV---KAPDEEYFEGAELKLLVWFVFCSTK---G  
 312078795 *Loa loa* --MST-----STLSVGS LDEITFSVEDV---PSVIEDYFEGAELKLLVWFVDFKNQ----

protists (seq. close to metazoa):

929755270 *Sphaeroforma arctica* JP610 --MGN-----DNTAKDVVVEGVV-----SDFEGAEKLLVWFVFE----PS  
 514686471 *Salpingoeca rosetta* --MDN-----NDFEGQEKLLVWFVFKPPN[11]

plants:

985701157 *Solanum tuberosum* -----MEMDLPVSAIGFEGFEKRLEISFVPEPLFAD  
 731352674 *Beta vulgaris* subsp *vulgaris* -----KNDNETGQ---PVSAIGFEGFEKRLEITFSNVPMFSD  
 302803606 *Selaginella moellendorffii* -----MPTPGFEGFEKRLEVEFFPAA----  
 168048070 *Physcomitrella patens* -----MGATACV-----SEVAPVCGA---LGTSPGEGFEKRLEIEFQPAPVFRD  
 702445187 *Eucalyptus grandis* -----MAASGFEGFEKRLELHFTGDE--PA  
 923724061 *Brassica napus* LSPHTNTNTHF--LCSVLVATSSVLFYQ---FFS--DL-PMAVSGFEGFEKRLELRFFNDS-ITN  
 514802427 *Setaria italica* GEKKFQSAAYS--NC-----AKKPS-----YA----HPVSAIGFEGYEKRLEITFSEAP[3]D  
 514756085 *Setaria italica* -----MASSGFEGFEKRLELVFSLPS[4]A  
 926775472 *Monoraphidium neglectum* -----MADR-R-PSMVLNPIFEGSEKRVEIDFAPSA---S  
 159470359 *Chlamydomonas reinhardtii* -----MTV-N-ENGLHMPLEFEGSEKRIEVDLRLGP---N  
 308810503 *Ostreococcus tauri* -----TMVDGLYPSPHFEGAEKRIEIDFHLNK----  
 612398587 *Bathycoccus prasinos* -----MQSELYPSPHFEGVEKRIEINFRVAA[9]I

Trypanosomatids Prozyme:

|           |                                    |                                                                      |
|-----------|------------------------------------|----------------------------------------------------------------------|
| 72390539  | <i>Trypanosoma brucei</i> TREU927  | ----DIGTVTVKQLASVMERAGESLRQNSAELGIHTLKFDRSLLVFTAKQIVVRSVSVMLHEAVHP   |
| 71408277  | <i>Trypanosoma cruzi</i> CL Brener | ----VPSEVAVLDLESVMHAGELLERHSAEKGLISLVFGNSLMQLTQRHVIVTSSSSVLLHEILGP   |
| 157872786 | <i>Leishmania major</i> Friedlin*  | ----DVQTFAVEELEDVLAAGQKLQHHFSAEGLLSLEMTQCIIILTPCKLVVTSASEVMLHQVITP   |
| 154341969 | <i>Leishmania braziliensis</i> *   | ----DVQTFKVAELEDVLAAGQELQHHSPAKDLLSLEMTQSILIVMKQKLVVTSASEVMLHQLITP   |
| 588319214 | <i>Phytomonas</i> sp. isolate_EM1  | ----PIGKLTVAIEALMRNVDEYLENYSCEGDFQSFQTLIVLITSKMLMSSNSTVMLHHVLPK      |
| 528258165 | <i>Angomonas deanei</i>            | ----GQDELCTADIEIILAAADQCLLEHSCGAMQSLTFSEALVLFNGRQFIVTADSSVHLHKLVP    |
| 528251074 | <i>Strigomonas culicis</i> *       | ----TAATFTVAEMEEVFAAADQYLVSQKCEYQVLTALTFQVLVALGSSQMVASADSIQVQLHKVIAP |

Trypanosomatids:

|           |                                    |                                                                          |
|-----------|------------------------------------|--------------------------------------------------------------------------|
| 72390527  | <i>Trypanosoma brucei</i> TREU927  | THVSGLLAHDDDDVWQKVIDAICAHIVSREFNEYIRS YVLS ESSLFVMDKDRVILI TCGTITLLNCVPL |
| 71408275  | <i>Trypanosoma cruzi</i> CL Brener | THSEGLHALGDEVWKGVVGSLNAQIVSKESNEYIRS YVLT ESSLFVMDRRIILI TCGTITLLNAVPF   |
| 157872783 | <i>Leishmania major</i> Friedlin   | THVDGLRSLDDSVWGSVVGSLNAQIVSRESNEYINS YVLT ESSLFVMDKDRVILI TCGTITLLNSIPN  |
| 154341967 | <i>Leishmania braziliensis</i>     | THVDGLRSLDDSVWTRVVGSLNAQIVSKEANEYINS YVLT ESSLFVMDKDRVILI TCGTITLLNSIPN  |
| 588319215 | <i>Phytomonas</i> sp. isolate_EM1  | THPDGLYSLEDDVWARVVGTLNAQIVSKENNAHIKS YVLT ESSLFVMDKDRVILI TCGTITLLNSIPE  |
| 528270660 | <i>Angomonas deanei</i>            | TNKEGFLSFEDSSWEHVVGSLNAEIVSREKNGQINS YVLT ESSLFVMDKDRVILI TCGTITLLNSVPI  |
| 529494686 | <i>Strigomonas culicis</i>         | TNKDGFSSFFEDAAWEKVVGALNAQIVSRESNEFIKS YVLT ESSLFVMDKDRVILI TCGTITLLNSVPI |

protists:

|           |                                     |                                                                          |
|-----------|-------------------------------------|--------------------------------------------------------------------------|
| 831777486 | <i>Acytostelium subglobosum</i> LB1 | PSRLGLRTLNERKQVSLDSARCTIISQTSNDFMDS YVLS ESSLFVYPRRVMVK TCGTITLLHLVDK    |
| 166240588 | <i>Dictyostelium discoideum</i> AX4 | PSKVLGLRTIDKEKWQTVLDSARCTIISQTSNDHMDS YVLS ESSLFVYPRRAMIK TCGTITLLHLIAK  |
| 330840910 | <i>Dictyostelium purpureum</i>      | TSKIGLRAINKDRWQQVSLDSARCTIISQTSNQFMDS YVLS ESSLFVYPRRAMIK TCGTITLLHLIAK  |
| 470246992 | <i>Dictyostelium fasciculatum</i>   | GPKSGLRSIGKEQWQVSLDSARCTIISSTSNQYLDSD YVLS ESSLFVYPRRVMIK TCGTITLLHLIEK  |
| 290984948 | <i>Naegleria gruberi</i> NEG-M      | SNFYNLMNVTDDETWQSMMLDACCRILSKKTNEHFVS YVLS ESSLFVFKRKLVIK TCGTITLLGILKK  |
| 676381665 | <i>Aureococcus anophagefferens</i>  | GRERGCRDLTRAQLDTMLTEARCTIILSHISNAHLDA YVLS ESSLFVYPFKVVIK TCGRITLLRCVVP  |
| 813169519 | <i>Saprolegnia parasitica</i>       | ADPRGLRALSRAQIDALLDAAKCTILSHVSNNAHLDA YVLS ESSLFVYPRKMLIK TCGTITLLKALPL  |
| 673049047 | <i>Aphanomyces invadans</i>         | GHPDGLRALSRTQLDALCDVAKCTILSKISNASLDA YVLS ESSLFVYPRKMLIK TCGTITLLKALPL   |
| 675188663 | <i>Phytophthora parasitica</i>      | GHERGLREVPRNDLDEMLEAGQCQIILSRTSNEHIDA YVLS ESSMFIYAHKIVLTCGTITLLKCLPY    |
| 294883519 | <i>Perkinsus marinus</i>            | KADLGRARAI SRSMWDKILALCECTIVSHKALKRLDA YVLS ESSLFVCAKDIILKTCGTITLLLQGLRT |
| 551667574 | <i>Guillardia theta</i>             | DINGGLRQYNREFWSDIVAILNGTILLADPQEKFDAYLIS ESSLFVYNDRVIILTCGTITLLLKLTPA    |

fungi:

|           |                                       |                                                                          |
|-----------|---------------------------------------|--------------------------------------------------------------------------|
| 629651635 | <i>Eutypa lata</i>                    | AKPNGLKAVPSDTWVDMMLDMVNCKIILSVLDSEHVDAYLIS ESSMFMVFPKHLILKTCGTITLLLLGLHR |
| 261202444 | <i>Blastomyces gilchristii</i>        | TEPTGLKVVVPEVWKDMLDLVSVCKVLSIIESDDVDAYLIS ESSMFMVFPKHLILKTCGTITLLSGLPR   |
| 50553544  | <i>Yarrowia lipolytica</i>            | GTNKS LRNVSTAQWEQLLNIVQCKVLSVHTSVLDAFVLS ESSMFMVFPKHLVLKTCGTITLLVGI PR   |
| 891574827 | <i>Schizosaccharomyces cryophilus</i> | NTKFGLKNVSRDLWDDMLSRQAQCKVLSVSSNEVDAYLIS ESSMFMVFPKHLILKTCGTITLLLASLPK   |
| 6324521   | <i>Saccharomyces cerevisiae</i>       | TIKTLRNLIGMDRWIEILKLVKCEVLSMKKTKELDAFLLS ESSLFVFDHKLTMKTCGTITLLFCLEK     |
| 444315950 | <i>Tetrapisispora blattae</i>         | GENKTLRDIAYEDWVLSILKLVNCEILSFKKTSQLDAYLIS ESSFFVYDYKVVVKTCGTITLLFCLQG    |
| 149237635 | <i>Lodderomyces elongisporus</i>      | SPRDGLRSIKMDAWAKMLDLVNCKIILSMKSSPFMDAYLIS ESSLFVFPKHLILKTCGTITLLACLDE    |
| 953449703 | <i>Mixia osmundae</i>                 | NALLGLRIVDRPSWERMLDEVHCKVLSVIEGEQVDA YMLS ESSMFMVFPKHLILKTCGTITLLLLGLNT  |
| 331247566 | <i>Puccinia graminis</i>              | PKFTGLRIVNHPLWHAMLDQVKCKVLSVIESEHVDAYLIS ESSMFMVFPKHLILKTCGTITLLLLGLDS   |
| 955498480 | <i>Moesziomyces antarcticus</i>       | PGYFGLRIVPKAVWETMLDVVKCKVLSVIESSHVDAYLIS ESSMFMVFPKHLILKTCGTITLLLLGLEK   |
| 914974225 | <i>Tilletiaria anomala</i>            | LRLGLKGVPREQWEEMLDIVKCKVLSVIESEVDAYLIS ESSMFMVFPKHLILKTCGTITLLLLGLER     |

animals:

|           |                                 |                                                                           |
|-----------|---------------------------------|---------------------------------------------------------------------------|
| 74275346  | <i>Homo sapiens</i>             | QGSGLRITPRSEWDIILKLVQCSIIISVTKTDKQEA YVLS ESSMFMVSKRRFILKTCGTITLLLLKALVP  |
| 936678339 | <i>Trichogramma pretiosum</i>   | ESKHLRILIPRQKWESLLKIVRCEIISFCRNDSDVDA YVLS ESSMFMVSKRRILILKTCGTITPLQCLEP  |
| 157115295 | <i>Aedes aegypti</i>            | NKNADLRKIPRAMWDALLKTVRCEIISFTRNEQIDA YVLS ESSMFMVSKRRWILKTCGTITPLQCLEP    |
| 24583360  | <i>Drosophila melanogaster</i>  | NGDDDLRNLISRSWENVLNVNQCIIISTSKNDIIDA FVLS ESSMFMVSKRRWILKTCGTITPLKCLGQ    |
| 910327857 | <i>Papilio xuthus</i>           | AKQADLRKITRQWKEVKLVIRCEIISFTKSEQVDA YVLS ESSMFMVSKRRWILKTCGTITPLRCVRA     |
| 871243907 | <i>Aplysia californica</i>      | NDSCDLRRIERKEWDDLKLVKCEIISFMRDSDMDA YVLS ESSMFMVSKDRFILKTCGTITLLMAVDR     |
| 675851988 | <i>Helobdella robusta</i>       | GGRASLRDINRSEWELLKLVNCEIILSSRHSTTMDA YVLS ESSMFMVSKDRILKTCGTITLLEAVKP     |
| 156370797 | <i>Nematostella vectensis</i>   | AKKGDRLRIPRQKWEKILQLVNCQIIISEKRNEDMI S YVLS ESSMFMVSKDRILKTCGTITLLYSIKP   |
| 761906225 | <i>Amphimedon queenslandica</i> | SESRLRDI PMSFWQVLLDLAKCHVLSKCNNEKLDAYVLS ESSMFMVSKDRILKTCGTITLLSTVKP      |
| 198416848 | <i>Ciona intestinalis</i>       | GPKKGANLIERWKWENILTHVHCKILDEMKHQDQTA YVLS ESSLFVSRERILKTCGTITLLCLQALPF    |
| 268561468 | <i>Caenorhabditis briggsae</i>  | ITDTSLRISIPRSEIDNMLDVARCKILHSHKHNESID S YVLS ESSLFVSDNRVILKTCGTITLLLAALPV |
| 312078795 | <i>Loa loa</i>                  | GGATSLRSIPYSELVAMLDIARCHILHSRSSECMDS YVLS ESSMFMVSDFRILKTCGTITLLLHTVRR    |

protists:

|           |                                   |                                                                        |
|-----------|-----------------------------------|------------------------------------------------------------------------|
| 929755270 | <i>Sphaeroforma arctica</i> JP610 | ETGQSLRLIKREDIDEFLRVAGCCVVAQCSNEKWDS YVLS ESSLFISDDMFLKTCGTITLLAAIPN   |
| 514686471 | <i>Salpingoeca rosetta</i>        | DDAQLRLAIPRARVEGILDEAKCCILDFAFHGDFMDS YVLS ESSLFITAYRIILKTCGTITLLPALPL |

plants:

|           |                                            |                                                                         |
|-----------|--------------------------------------------|-------------------------------------------------------------------------|
| 985701157 | <i>Solanum tuberosum</i>                   | PNGKGLRSLSKAQLDEILGPAECTIVDNLSNDYVDS YVLS ESSLFVYSYKIIKTCGTITKLLLAIPP   |
| 731352674 | <i>Beta vulgaris</i> subsp <i>Vulgaris</i> | PTGLGLRSLTRAQLDSFLDEAACTIVAELSNSEFDS YVLS ESSLFVYPHKIIKTCGTITKLLLAIEP   |
| 302803606 | <i>Selaginella moellendorffii</i>          | --ARSLRSLSRDIDSFLNVAECTIVSQLSNGHFD S YVLS ESSLFYIYRRIIYKTCGTITRLLKALPK  |
| 168048070 | <i>Physcomitrella patens</i>               | PNGRGLRDLTRSELDMLCVAECTIVSQLSNAEVD S YVLS ESSLFVYPHRIIYKTCGTITKLLCIVPV  |
| 702445187 | <i>Eucalyptus grandis</i>                  | AVRMGLRRIDFESLERVLHEVQCTVVS AVGNAHLDA YVLS ESSLFVYPTKIVIKTCGTITQLKSVRP  |
| 923724061 | <i>Brassica napus</i>                      | TNPIGLRLIDFESLDQVLNEVQCTVVS AVANHSFDA YVLS ESSLFVYPTKIIKTCGTITQLKLSIRP  |
| 514802427 | <i>Setaria italica</i>                     | PHGRGLRALSRAQIDS VLDLARCTIVSELSNKDFDS YVLS ESSLFYIPLKIVIKTCGTITKLLLTIPR |
| 514756085 | <i>Setaria italica</i>                     | RAQHGLRLLPVGALREALDTVQCAVVS AAGNAAFDA YVLS ESSLFVYPSRAILKTCGTITRLLRAVPI |
| 926775472 | <i>Monoraphidium neglectum</i>             | TPAAGLRALSRAQLDEMLSLAECTIVSSRTNDHLDAYVLS ESSLFVYPTKVVILKTCGTITKLLNAVPR  |
| 159470359 | <i>Chlamydomonas reinhardtii</i>           | VPANGLRILPRETLDELMTLARCCIIVSSRNDKLDAYVLS ESSLFVYPTKVVILKTCGTITRLLNSVPR  |
| 308810503 | <i>Ostreococcus tauri</i>                  | ENPRGLREI TRTQLDECMTARCEIVSVRTNVKFDAYVLS ESSLFVYPTKVVILKTCGTITHLLAGVPA  |
| 612398587 | <i>Bathycoccus prasinos</i>                | PVAGGLRCLSRALDVCMTAAECEIVSVRSNEKFDAYVLS ESSLFVYPTKVVILKTCGTITKLLSAVDP   |

Activation Residues

positions anchor strand  
 displaces N132; forms N-helix pocket prozyme/enzyme interaction  
 Putrescine \* \* \*

Trypanosomatids Prozyme:

72390539 *Trypanosoma brucei* TREU927 MLELMRSH----NIIIVDWSFMRVNYGSPWDMTSET---MAHEFYAELKSAFP-----TGHYPYLAGP-  
 71408277 *Trypanosoma cruzi* CL Brener LLDLLRSH----GIDIEWASFMRNNTSPWSSLCSEM---MAQEQYALQKSVFPP-----SGHPYLTGP-  
 157872786 *Leishmania major* Friedlin\* TIALLTSK----GVRVEWASYLKRNKNTSPWCAESEM---MAQEQYAEKKAAFP-----AGKSFLTGP-  
 154341969 *Leishmania braziliensis*\* IIAFLKSK----GVRVEWASYLKRNKNTSPWCTDSET---MAQEQYAEKKAAFP-----TGKSFLTGP-  
 588319214 *Phytomonas sp.\_isolate\_EM1* LLDLLNQR----SVLVEWMSFSRRNTTAPWSTQCETSDIMAQEQYAEKKAAFP-----TGQSFLTGP-  
 528258165 *Angomonas deanei* LVKMLSEK----NIDIEWASFCKRKNISSPVDHNDTSDVMACEYAEKKAFA-----DGQSFLTGP-  
 528251074 *Strigomonas culicis*\* FMALCARK----GVQAEWASFFRKNTHSPWEHS-DTSDMMACEYAEKSSLP-----QGHSFLTGP-

Trypanosomatids:

72390527 *Trypanosoma brucei* TREU927 ICEAVSTV----CGEVEVWVFMHKNYSFPWEQKGPVPH---MAEEFKTLRSHFP-----SGQPFIFGP-  
 71408275 *Trypanosoma cruzi* CL Brener VLDAVSDV----RGEVEVWVFMHKNYSFPWEQKGPVPH---MAEEFNLTLYTFP-----SGKPFIFGP-  
 157872783 *Leishmania major* Friedlin ILEAISAV----RGELEWVFMHKNYSFPWQKGPVPH---LADEFATLQKQHP-----TGKPYIFGP-  
 154341967 *Leishmania braziliensis* ILEAISAV----RGELEWVFMHKNYSFPWEQKGPVPH---LADECATLQKQHP-----TGKPYIFGP-  
 588319215 *Phytomonas sp.\_isolate\_EM1* ILKAIASV----RAELEWASFMHKNYSFPWEQKGPVPH---LSGEIATLQKSHFP-----TGKTYILGP-  
 528270660 *Angomonas deanei* IMELISCM----RGEVEVWVFMHKNYSFPWEQKGPVPH---LSEEFNHLKTHFP-----TGKPYILGP-  
 529494686 *Strigomonas culicis* ILELISCM----RAELEWVFMHKNYSFPWEQKGPVPH---LSEEFNHLKAHFP-----TGRPYILGP-

protists:

831777488 *Acytostelium subglobosum* LB1 MVEVGR---CGLEIEMVLFSSRKNLNNPHKQVFPVPH---FDDEVKYLNKTFFN-----GQAYVMGP-  
 166240588 *Dictyostelium discoideum* AX4 MVQVQKE---CGLEVEMVVFSSRKNLNQPSKQVFPVPH---FSDEVNFLNKIFD-----GQAYVMGD-  
 330840910 *Dictyostelium purpureum* MVEVQKE---CGLEVEMVVFSSRKNLNQPTKQIFPH---FNDEVAFLNKIFK-----GEAYVMGD-  
 470246992 *Dictyostelium fasciculatum* MTQLAKDT---CGLEVEMVLFSSRKNLNNPGKQIFPH---FSDEVYDYLNKIFNN-----AGHAYVMGP-  
 290984948 *Naegleria gruberi* NEG-M LKEIAAT---QGLEAELVIFSRKNYVFPVPHRQPHYH---FEEELKLYLTDFFP-----GGEGHVGS-  
 676381665 *Aureococcus anophagefferens* LVDAATKA [5] LGLKLEWVGYSRKNYAFDEQPSPH---FGEELAYLRAHRD-----GYVLGP-  
 813169519 *Saprolegnia parasitica* LTEYVRD---LGLAVEKVRYSRKNFLFPDDQLFPH---FADEVYDYLNDFFP-----NGAAHILGP-  
 673049047 *Aphanomyces invadans* IMEYLQE---LNMAIEKVRYSRKNFLQPEEQHPVPH---FSVEVEYLNDFFP-----NGVAHVLP-  
 675188663 *Phytophthora parasitica* IKTFSE---LGLEIEMVNYSRKNYTFPEEQKYPVPH---FQTEVAVFLSSYFP-----KGSYVLP-  
 294883519 *Perkinsus marinus* LLDHAVNE---LGLELEWVLFYSRKSFLFPEFQVGVHG---SLEDEVSVLREVCKDFGCSTGNAYVLP-  
 551667574 *Guillardia theta* IMKAGAD---VGLVVCWFQYSRKNFLFPEEQSFPVPH---SFDQEVHFLHEYFP-----TGRPFIMGP-

fungi:

629651635 *Eutypa lata* LLRIAAEH [16] AATPWRVVFYSRKNFLFPHKQEGPHR---SWKQEVKYLDDMFE-----GGSAYMVGK-  
 261202444 *Blastomyces gilchristii* ILEIAAVY [16] AAAPYRVVFYSRKNFLFPDRQVPHR---SWRDEVKAMDQLFL-----GGSAYMIGK-  
 50553544 *Yarrowia lipolytica* LLEIARTI [4] ANATPYRVVFYSRKNFLFPEKQAPPHK---SWKDEVSYLDSQDF-----NGKAYLVGD-  
 891574827 *Schizosaccharomyces cryophilus* LLEIASS---VGFTPLRTFYSRKNFLYPERQLAPHT---SWNDEVAVFLQVFFP-----KGSYVVG-  
 6324521 *Saccharomyces cerevisiae* LFQIVEQE [11] KYKPFKVFYSRRCFLFPCKQAAIHQ---NWADVDYDYLNKFFD-----NGKYSVGR-  
 444315950 *Tetrapisispora blattae* LFNLLFRK [14] KYTPYKVFYSRRCFLFPCKQKSIHQ---KWSDEVKYLDDQFFA-----NGRNYLVGR-  
 149237635 *Lodderomyces elongisporus* LFQMTQRICQLTSKEIYRVVFYSRSMFMEPEKQIHVHK---DWKHEVSLNQHFM-----LGKSYVGN-  
 953449703 *Mixia osmundae* LLRIAAEH---CGLGKVVRCFYSRKTFMFERQLGPHR---DWNQEVRFLDGVFD-----NGSAYAVGR-  
 331247566 *Puccinia graminis* LLKIAKEE---CGFSGAWRVFYSRKAFMFPAPQVPH---SWEDEVTRFLDHRFA---PHATAQVGL-  
 955498480 *Moesziomyces antarcticus* LLTIATRA [50] GAVVKHAFYSRKSFMFERQKGPVPH---DWMLEVAVLDLRFDD-----YGSAYTVGK-  
 914974225 *Tilletiaria anomala* LLEIAFSA [34] GSVLVRFCFYSRKSMFERQKGPVPH---DWMTEVATLDLDAFFT-----NGSAYTVGK-

animals:

74275346 *Homo sapiens* LLKLARDYS---GFDSIQSFFYSRKNFMKPSHQGYPH---FQEEIEFLNLAIFP-----NGAAYCMGR-  
 936678339 *Trichogramma pretiosum* LLDLVEYSY---GFDKVENLFYSRKNYKRPQLIAPH---FEEEVTLTLDTFPP-----DGEAYCLGS-  
 157115295 *Aedes aegypti* LLRLASEIA---GYGEIEDLFYSRKNFKRPEMVSPPH---FEEEVAVFLDSFFE-----DGRAYSLGA-  
 24583360 *Drosophila melanogaster* LLKLAEAN---GYNVADLFYSRKNFTRPEAQITPH---FTEEVTYLDSIFP-----NGRSYCLGS-  
 910327857 *Papilio xuthus* VLALARDTA---GHARVNVFYSRKRFARPHACLTPH---FDEVEVLLDSFFG-----DGRAYIMGP-  
 871243907 *Aplysia californica* LVELVKQRC---GYDVTADIFYSRKNFTRPELQHLLH---FDKEVEHLDNMFK-----NGAAYVLGR-  
 675851988 *Helobdella robusta* LLGLAKEQC---GFDNIVDFYSHKNYLRPDLQPEY---FDQEVAMLDLTFE-----DGAAYVLGK-  
 156370797 *Nematostella vectensis* LLNLAAEEC---GLTIVQDLFYSRMNYLKPDMQKDLH---FEKEVQWLDKLF-----NGAAYSLGR-  
 761906225 *Amphimedon queenslandica* LLKTVKFFY---PRSEVDFFYSHSPFMKPDQLLPH---FNDESTYLDLTFP-----DGAAYVLGR-  
 198416848 *Ciona intestinalis* IIQLVQDEC---GFDTVADFFYSRKNFIKPDNPPHY---FQDETVYLDLTFP-----ESASYCLGR-  
 268561468 *Caenorhabditis briggsae* LMQLAGTYA---GLDQVQSVYYSRKNFLRPDLQPNLH---FDAEVEYLDLTFE-----DGHAYCLGS-  
 312078795 *Loa loa* ILHLAKIYC---NVDNVVSVFYSRKSFIRPERQVPPH---FETEVDYLEEHT-----GGSAYCIGP-

protists:

929755270 *Sphaeroforma arctica* JP610 MISLAKDL---GRNNVDVVFYSRKNQFMEPEQVPH---FEEEVKFLDLSLF-----DGAAYQLGR-  
 514686471 *Salpingoeca rosetta* IVQAAADV---GLTEIDDMFFSRRFETIAPHTQEPH---FEEVAVYLDQYFD-----GVAYPLGR-

plants:

985701157 *Solanum tuberosum* ILRLAET---LSLKVQDVRYTRGSFIFPGAQSPVPHR---FSEEVAVLDGYPFGKL---AAGSKAVIMGSP  
 713152674 *Beta vulgaris* subsp *vulgaris* VLKLADS---VGLSVLSVLYSRGTFIFPNAQVAPH---FSEEVSYLNRYFGNL---GSGPHAYVLGDP  
 302803606 *Selaginella moellendorffii* LLAVAASIG---LARVNR---CKYTRGSFLFPEVQPPH---FDEEVRTLDEHFGSL---HSSKHVVMGD-  
 168048070 *Physcomitrella patens* LLEVVAR---LAMKVRVYKTRGTFMFPVQPPYH---FSEEVGYLEKYFGGI---GSGGRAYVMGNR  
 702445187 *Eucalyptus grandis* LVAHARD---LGLTLCLCRYTRGSFIFPLAQPPH---FPEEVAYLEGCLPTN---VCSRKASIMRSH  
 923724061 *Brassica napus* LIHLARN---VNLTLRACRYSRGSFIFPNSQPPY---FEDEVVIVEESLPKS---LRYRKASVMTPS  
 514802427 *Setaria italica* IIEIAEE---LSMPLAAVKYSRGMFIFPGAQVPH---FSEEVVALNRYFGGL---KSGGNAYVIGDP  
 514756085 *Setaria italica* LLRAAQG---LGLALRSCRYSRGSFLFPEAQPPH---FADIEIRFLDGAVLSA---LRFRRSSVMPSP  
 926775472 *Monoraphidium neglectum* LLELASQ---LGMAPRRCKYSRASFLFPEQVAPY---FDQEARFLRTHFGHL---GNNGSAYVLGDM  
 159470359 *Chlamydomonas reinhardtii* LLEVARS---IGLEPRRCKYTRASFIFPENQPPY---FEHEVGFLEHFGAMCANGGTAFMLGEP  
 308810503 *Ostreococcus tauri* ILKYAKE---VGMEPRRVKFTRSSFDKPDLPALH---FDDEVDFLEKHFGLSIEGSSYILGSK  
 612398587 *Bathycoccus prasinos* ILERAASIER---LKLVPSSVRFTRSTYLFPEEQREHH---FTDECEFLGRFGHL---GNSNSYVMGNS

shift+3; prozyme/enzyme interaction

Activation Residues

shift+1

\* \*

Trypanosomatids Prozyme:

72390539 *Trypanosoma brucei* TREU927 --VDRDHCFFYFVYDGDIDRDP-----SCSRENDVQINVYMYNVQADDEY-DLDG-----  
 71408277 *Trypanosoma cruzi* CL Brener --LDSDFHFFYFVYDAIERNVL-----GAPPEDDVQINVYMYNVKTDGSG-DDDD-----  
 157872786 *Leishmania major* Friedlin\* --VDGHHCFFNFVYDNVERIA-----GRKEEDVQVNVFLNDVAAGLEE-----  
 154341969 *Leishmania braziliensis*\* --VDGHHYFNFVYDGNVRVA-----ERKEEDVQVNMFLYDVAEGLDE-----  
 588319214 *Phytomonas sp.\_isolate\_EM1* --VDSEHYFFFTFDADRSE-----GNAVEQDVQINVFLYDIVEREDDE-LA-----  
 528258165 *Angomonas deanei* --IDGHEHFFHYIYDNIQRAAAV---ESGRVEEDVQLNAYFYNIQNDDET-----  
 528251074 *Strigomonas culicis*\* --IDGDHFFHYIYDNIERGD-----ERARVEVDTQLNLFHLGLKADQV-----

Trypanosomatids:

72390527 *Trypanosoma brucei* TREU927 --IDSDFHYFLYFHSDDVVQP-----SCSDDAQLSMTMYGLDRNQ-T-KHWYSDKM----PTGPET  
 71408275 *Trypanosoma cruzi* CL Brener --VDSDFHYFLFVYDDVIRPC-----ETENDTQLSMTMYGLDRQT-KHWFSDRF---STGTET  
 157872783 *Leishmania major* Friedlin --VDSDFHYFLFCYDDIIRPC-----SSEDNTQLSMTMYGLDKEQT-KYWFSDRF---STSAET  
 154341967 *Leishmania braziliensis* --VDSDFHYFLFCYDDIIRPC-----NSEDDTQLSMTMYGLDKEQT-KYWFSDRS---STNAET  
 588319215 *Phytomonas sp.\_isolate\_EM1* --VDSDFHYFFFCYDDVIRPY-----SNEDDTQLNMTMYGLDKEQT-KYWFSDRF---ISTSAET  
 528270660 *Angomonas deanei* --VDSDFHYFFFCYDDIIREEGN----TVYEADAQLSMTMYGLDHNQT-KHWFHDKF---ECTNDIT  
 529494686 *Strigomonas culicis* --VDSDFHYFFFCYDDIIRDTSK---LDTGYETDAQMSMTMYGLDPNQ-T-QYWFNDKF---ECTNEVT

protists:

831777486 *Acytostelium subglobosum* LB1 --LTKDHWNLVIADMRQGN-----TLQRTEQTFEVMHDLDQEVN-KQFFKR-----EGVTA  
 166240588 *Dictyostelium discoideum* AX4 --VNKDHWNLYIADFRKNP-----TLQRTEQTFEVMHDLDETVM-KQFFKR-----EGVSA  
 330840910 *Dictyostelium purpureum* --VNKDHWNLYIADYRKNK-----TVQRTEQTFEVMHDLNPEVM-KQFFKR-----EGVSA  
 470246992 *Dictyostelium fasciculatum* --LNKDHWNLCYIIDNRRSS-----TIRRTEQTFEVMHDLDPQVM-KQFFKR-----DGVSA  
 290984948 *Naegleria gruberi* NEG-M --VLSDFHWYIYICDMQGVDDQ-----ITKDPDQTFEVLMLHDLDPAVM-RQFMEEARK---ERAPG  
 676381665 *Aureococcus anophagefferens* --ITGDHWFVYVADQCERP-----AASATERTINIMFDLGEDVR-DAFYLKPGE---DLRSAA  
 813169519 *Saprolegnia parasitica* --INADHWFAYAWDVEHEGEPVA--KPSAGVKEHTLHILMQDMHEDAA-AAFFKRD-----NGWDG  
 673049047 *Aphanomyces invadans* --ITGDHWSYSNWDADTHGPN5 [5] VCDERKSEHTVHMLMQDMHADAA-AHFFKRD-----NGMDG  
 675188663 *Phytophthora parasitica* --LNHDHWYIYAWDADHEQPG [7] LKEPRANESTLQVLMQDMHPSVA-LQFFKNNND-----STMTS  
 294883519 *Perkinsus marinus* --LNGDHWIMWNADFKEVD-----SNRYDHNLDIMMYDLPDDVR-SKFFSSSA-----SGTVA  
 551667574 *Guillardia theta* --LSSDFHWYLFVADFIRRETPDG--SRKIVDRDQMLNIYMYGIDPQVA-QYFMKADP [29] EFCATG

fungi:

629651635 *Eutypa lata* --MNGDHWYLYITSPQSPFTPP [26] GGLESNDETEILMTDLDPENA-KKFFYLENA [91] EGHALG  
 261202444 *Blastomyces gilchristii* --MNGDHWYLYLTPYTVLTPP [33] EEEDEEDETLEILMTDLDEENA-KQFYLDHA [55] EGHGLG  
 50553544 *Yarrowia lipolytica* --TTSDDHWCYVLTGDDHDEEVAHKDHISSHDETEILMTDLLPSRA-QQFFTDRL [49] PGHVLG  
 891574827 *Schizosaccharomyces cryophilus* --TNKNHWWYLFSDVADESDFE---SSLDPEDETEILVMTNMSPEVS-LQFFYAPSL [23] TGHILG  
 6324521 *Saccharomyces cerevisiae* --NDKSNHWNLYVTETRSTPKG---KEYIEDDDETEFVLMTELDPECA-SKFVCGPE [12] KGHNLG  
 444315950 *Tetrapisispora blattae* --NPSEAGHWNLYITDNTKILENK [6] QTQIDREDETEMLMTGLDQTM-KYFHKDIS [5] DDGHEMG  
 149237635 *Lodderomyces elongisporus* --FASDDHWFYLVGGKEDDDCRE [11] FGNKPLDQTFEILMTELDPECA-SKFIYSRQ [9] DLGHELG  
 953449703 *Mixia osmundae* --INGDHWVLYLTPAMDALGL [34] SLGMPDQTFEILMSELDPPEAS-RAFFHPIS [7] DDGHAAG  
 331247566 *Puccinia graminis* ----ENPWYLYHRTAPPRSGSA [29] SQAERDYTEILMTGLSRRRA-SHFESSEE--LGEHHEAG  
 955498480 *Moesziomyces antarcticus* --MNGDHWLWLMWCGEGAREAER [13] PAPCVEDQTFEILMTHLSPASC-ARFVFDEN [27] KGHALG  
 914974225 *Tilletiaria anomala* --MNGDHWLWLYMAADQAQGEAG [21] AKQAVDQTFEILMTHLSPASC-ARYYFADD [25] KGQRLG

animals:

74275346 *Homo sapiens* --MNSDCWYLYTLDFPESRV-----ISQPDQTFEILMSELDPAVM-DQFYMK-----DGVTA  
 936678339 *Trichogramma pretiosum* --EESCEWYLYTLNREAPSSTP [21] TNEREPDQTFEIMMTQLDPKVM-SIFTRH-----VCSSA  
 157115295 *Aedes aegypti* --LNRDCWHLTYLTSRGGGGSAN [41] LQLPDPDQTFEILMTDLDPKVM-AVFTKD-----VCNTA  
 24583360 *Drosophila melanogaster* --MNLCEWYLYTFSRSDIKITP [6] KNVSDPDQTFEILMQDLDPETM-SIFYKN-----KFNDA  
 910327857 *Papilio xuthus* ---EKDCWYLYLTLPLGTVAA [14] CAGEPDQTFEILMSDLDPAVM-SIFTRA-----HSASA  
 871243907 *Aplysia californica* --MNKDCWHLTYLLEDGN-----VHQSDQTFEILLMWDQCQDKM-KIFTKE-----ISSDG  
 675851988 *Helobdella robusta* --LNKDCWYIYTLDRFN-----ITEPDQTFEIMMDVNVQDVM-NMFTQS-----YGLTA  
 156370797 *Nematostella vectensis* --VNGDSWYFYTLRQQG-----VEQPDQTFEILMQDLDPNVM-KAFYTG-----QYANV  
 761906225 *Amphimedon queenslandica* --INGKCWYLYLVESIENP-----LQDPDQTFEILMTEFDSELI-GRFSKL-----SYESA  
 198416848 *Ciona intestinalis* --MNRDCWYLYTLNHPENTSL----IGVNQPDQTFEILMTNLSVESM-QKFTRCDE----GNVRNA  
 268561468 *Caenorhabditis briggsae* --LKQDRWYLYTFHREVEF-----PANKQPDHTEILMSDLDEEVL-HKFTKD-----FAVDG  
 312078795 *Loa loa* --RRQDCWFLYTYMVAAPRAA-----FPFPEHTLEILMNGLPEDVL-NVFNPS-----VSKDG

protists:

929755270 *Sphaeroforma arctica* JP610 --LNGDSWYLYMLDHPDG-----SIEKPDQTFEILMMDLDQEAM-KAFHVSP-----EYPTT  
 514686471 *Salpingoeca rosetta* --LNGDRWYLYTLNQLH-----ITCPDVTVEIMMTSLDRTAM-NAFYK-----STLTA

plants:

985701157 *Solanum tuberosum* D--KTQKWHVYASAGS-----VQSNDPVYTLMECMTGLDREKA-SVFYKT-----EESSA  
 713152674 *Beta vulgaris* subsp *vulgaris* T-VQNCNWHIYSASCVADVE-----DRRGVVTVMCMTGLNREKA-AVFYKK-----EGHLA  
 302803606 *Selaginella moellendorffii* ---DRQKWHVYVASESKSDRAGE-AVSKSNTIYTLVECMTELDKLSVA-RSFFKS-----ASIVTG  
 168048070 *Physcomitrella patens* --GKFPNWHIYTACEQNADASG [4] EEEEEECVYTVEMCMTKLGRRA-GQFWKG-----AGRESG  
 702445187 *Eucalyptus grandis* M-AASHSWHVFTACDPLVMDKG----PAPEDFYTVEMCMTGLDRGRA-QKFFMRP--GDGTGDSAG  
 923724061 *Brassica napus* NSNPSRAWHVFTASADVEP-----DESLVVVEVCMTGLDRVNA-RSFFRRK--GDENSDSAG  
 514802427 *Setaria italica* A-RPGQKWHIYYATEYPE-----QPMVNLEMCMTGLDKKA-SVFFKTS--AD-GHTTCA  
 514756085 *Setaria italica* [5] QQHKWHVYAASTDDQHV-----DGATFTVEVCMTGLDRTLA-RQFYLTTPGDGTSIAIG  
 926775472 *Monoraphidium neglectum* ---FNLQWHVYVADAHGADAAAYA---PPSGRPFHKFEVCMTGLCRVAA-AAFYRDN-----PAFVSA  
 159470359 *Chlamydomonas reinhardtii* --YQGLQWHVYVLAADDMLPLGP-----EFKPTYNFVMTDLGTEAA-AQFFRDN-----PKFVSA  
 308810503 *Ostreococcus tauri* --LKGVQWHVYVAGDACPQV-----DARPKASLEVCMTQLNREHCDEHFYRT-----DKFVSS  
 612398587 *Bathycoccus prasinos* --FDDAQWHVYVAGDFVEET-----KSEASLSECCMTSLHREHS-QHFFRENSQEEGVFPVSS

Trypanosomatids Prozyme:

72390539 *Trypanosoma brucei* TREU927 -----NTKEQQLVSHCA----GEYETLRVSTYGSTHPFASFET  
 71408277 *Trypanosoma cruzi* CL Brener -----ALKSVQVVPLSE----TEYEMLRVSTDNTHAFPAAFET  
 157872786 *Leishmania major* Friedlin\* -----VNKTTQRFHALQS----GEYEVMTFTA---GVPCISFET  
 154341969 *Leishmania braziliensis*\* -----VDKTTQRFALALPN----GEYEVTRTFA---GVPCVFSFET  
 588319214 *Phytomonas\_sp.\_isolate\_EM1* -----PNVGLTRKNTQQLTHLEG----NTYEIMRTFD---DISYISFET  
 528258165 *Angomonas deanei* -----NEKDRQSINILPD----GTYTVDKVFP---HAHCATFET  
 528251074 *Strigomonas culicis*\* -----TTPTVKGVNHQLVVLPE----GFYEMHRKFP---EAGSATFET

Trypanosomatids:

72390527 *Trypanosoma brucei* TREU927 AVIREATGLSEVVD----DSWILHDLQYFPCGYSINAIRG----SEYQTIHITPE-EHCSFASFYET  
 71408275 *Trypanosoma cruzi* CL Brener AAIRKATKLDKVD----DSWKLHDLQFPCGYSINAIRG----AEYQTIHITPE-DHCSFASFYET  
 157872783 *Leishmania major* Friedlin AAIRAATHLDRVVD----GTWTLHDLQFPCGYSINAIRD----EEYQTMHITPE-DHCSFASFYET  
 154341967 *Leishmania braziliensis* AAIRSATHLDRVVD----NSWSLHDLQFPCGYSINAIRD----EEYQTIHITPE-DHCSFASFYET  
 588319215 *Phytomonas\_sp.\_isolate\_EM1* AAIRAATHLDRLVD----ETWTFHDLQFPCGYSVNAIRE----GEYQTIHITPE-EHCSFASFYET  
 528270660 *Angomonas deanei* QKIRKDKLDILFN--KEEGWTIHDLQFPCGYSINAIRG----SDYATTHITPE-SHCSFASFYET  
 529494686 *Strigomonas culicis* AAIREHTLHCQLFP--SEAGWKLHDLQFPCGYSINSING----ANYQTIHITPE-SHCSFASFYET

protists:

831777486 *Acytostelium subglobosum* LB1 WDTTVSSGIANLIP----GSI-IDDFQFPCGYSMNLGRNK----AYWTIHTIPE-DHCSYVVSFDT  
 166240588 *Dictyostelium discoideum* AX4 WDTTVNSGIADLLP----GSM-IDDFQFPCGYSMNGLLNE----FYWTIHTIPE-SHCSYVVSFDT  
 330840910 *Dictyostelium purpureum* LDTTVSSGISNLLP----GSI-IDDFQFPCGYSMNGLLDQ----WYWTIHTIPE-SHCSYVVSFDT  
 470246992 *Dictyostelium fasciculatum* WDTTVSSGISNLLP----GSI-IDDYQFPCGYSMNGMLDK----WYWTIHTIPE-DHCSYVVSFDT  
 290984948 *Naegleria gruberi* NEG-M VTIEQQSGIDKLLP----GSE-IDSFEFPCGYSMNGLLGK----TYWTIHTIPE-DSCSFVSFET  
 676381665 *Aureococcus anophagefferens* RAMTARSGLGALIP----SSSHLDHAFAPCGYSMNALCFE----SYTIVHVTPE-ASCYSYASFET  
 813169519 *Saprolegnia parasitica* AVMSEKSGIRDLAP----DAI-MDAFAFPCGYSMNAIDGP----SYSTIHTIPE-SHCSYASFYET  
 673049047 *Aphanomyces invadans* AKMSEASGIRDLVP----NAI-LDSFAFPCGYSMNSIEDD----VYSTIHTIPE-SHCSYASFYET  
 675188663 *Phytophthora parasitica* RRMTIESGIRDLVP----GAV-IDDFAFPCGYSMNGILFD----AYYTIHTIPE-SHCSYVVSFET  
 294883519 *Perkinsus marinus* DRMSEESGICDIYP----GAV-VDAINFTPCGYSNALSDD---GESFTIHTIPE-ESCSYASFYET  
 551667574 *Guillardia theta* DEASDRSGISSLLEHD--GKV-VHSHLFPCGYSMNGQAAD---GSSYWTIHTIPE-AHCSYASFYET

fungi:

629651635 *Eutypa lata* TVVSDVGLSEVYPTSKYPDARIDSYLFSPCGFSANGIVPA [31] THYFTIVHVTPE-PVCSFASFYET  
 261202444 *Blastomyces gilchristii* TVVAESCGLTDIYPTSKYPGARVDAYLFTPCGFSANGVPPA [17] SHYFTIVHVTPE-PHCSYASFYET  
 50553544 *Yarrowia lipolytica* AYVSTQSGIADIYPRN-KASVAVDSFCFTPCGYSANAVDS----GYYYTIHVTPE-QHCSYASFYET  
 891574827 *Schizosaccharomyces cryophilus* TYMAELSGVKELCSTK-DGKSVLDAFQFPCGFSNMIIYKD----RYATIHTIPE-DHCSYASFYET  
 6324521 *Saccharomyces cerevisiae* YQMTKNTRLDEIYVN [6] LSFHHDFAFPTPCGYSNMILAE----KYYYTLHVTPE-KGWSYASFES  
 444315950 *Tetrapisispora blattae* NEMTRCSKIDKIYTLDNNSTIISDSFAFPCGYSNNIIDE----SNYFTLHVTPE-KGWSYASFES  
 149237635 *Lodderomyces elongisporus* RETMIETELDSVFP [72] EFLHDAFAFPTPCGFSNSISCSN-IGGGYYTLHVTPE-SGWSYASFET  
 953449703 *Mixia osmundae* TRVSRQVGVQDLFP----DAVLDAFLFPCGYSANAVLDD----RYATIHTIPE-QDWSYASFEC  
 331247566 *Puccinia graminis* IQIATSLGIDAPGLLG---SGETDAYLFSPCGFSANLVGGP--DQKRYGTIHTIPE-RSHSFASFES  
 955498480 *Moesziomyces antarcticus* LALSINKLGLTQLLP----ETEIDAFAPPCGYSANAVMPR [5] NAGYWTIHTIPE-EDSSFASFET  
 914974225 *Tilletiaria anomala* VALASQLGLTNLFA----ETHVDFAFAPPCGFSANAVVLN [15] DGYWTIHTIPE-EGSSYASFET

animals:

74275346 *Homo sapiens* KDVTRESGIRDLIP----GSV-IDATMFNFCGYSMNGMKS----GTYWTIHTIPE-PEFSYVVSFET  
 936678339 *Trichogramma pretiosum* EEATRKSIGIDQLLP----NML-IDDFLFPCGYSMNGVSKN----GSYMTIHTIPE-PDFSYSVSFES  
 157115295 *Aedes aegypti* LEATQKSGIHKLIP----GMV-IDDYLFPCGYSMNGVSKS----GCYMTIHTIPE-PDFSYSVSFES  
 24583360 *Drosophila melanogaster* NGATVKSIGIDTILP----TMH-IDDFLFPCGYSMNGINDK----GEYMTIHTIPE-NQFSYVVSFET  
 910327857 *Papilio xuthus* HHATKESGIDKIIP----GMV-IDDYLFPCGYSMNGVAKD----GCYMTIHTIPE-RSCSYVSFES  
 871243907 *Aplysia californica* K4ATKESGIDKIIP----GLQ-IDDFLFPCGYSMNGILPG----GRYTIHTIPE-PHCSYVSFES  
 675851988 *Helobdella robusta* SQLTEKTGILDILP----GAI-IDDWLFPCGYSMNALLPN----GRYFTIHTIPE-DEFSYVSFET  
 156370797 *Nematostella vectensis* SEVTKATGIADFIP----GAI-IDDFLFPCGYSMNGLFGD----NYFTIHTIPE-KECSYVSFET  
 761906225 *Amphimedon queenslandica* EDLNKSTGLNDLIP----GAT-IDSYIFPCGFSLNIAIVKE----DMYFTIHTIPE-EBCAYVSFET  
 198416848 *Ciona intestinalis* AKFTEDIGISDILP----GSK-INSILFPCGYSMNGLLDK----NQYWTIHTIPE-PEFSYVVSFET  
 268561468 *Caenorhabditis briggsae* KDCFMRAGIDKIIPA---GAD-VHDELDFPCGYSMNAYIND---TDQYATIHTIPE-KEFSFASFET  
 312078795 *Loa loa* KDCRMKSAINTILPP---GII-VHEELFPCGYSNLGLIPH---SDHYIMIHTIPE-PDFSYSVSFET

protists:

929755270 *Sphaeroforma arctica* JP610 EVVTKKSGIADFLP----GAM-TSGALFNFCGYSVNGLLGD----AYFTIHTIPE-EGFSYASFET  
 514686471 *Salpingoeca rosetta* REVTTQSGIADIVP----GAH-IHEFLFPCGYSNNAVFG---FYFTIHTIPE-EFYSYVSFET

plants:

985701157 *Solanum tuberosum* AHMTVRSIGIRKILP----KSE-ICDFEFPCGYSMNSIEG----AAVSTIHTIPE-DGFTYASFES  
 731352674 *Beta vulgaris subsp vulgaris* KEMTKMSKINDIIS---SHE-ICDVDFPCGYSMNGVDG----GAYSTVHVTPE-DGFSYASVEV  
 302803606 *Selaginella moellendorffii* EDMTRASGINSILP----RSQ-ICDFAFPCGYSMNGLEN----GAHSTIHTIPE-DGFSYASFEC  
 168048070 *Physcomitrella patens* EEMTAGANISLLP----ESR-ICDFAFPCGYSMNGIEG----AAHSTIHTIPE-EGFSYASFEC  
 702445187 *Eucalyptus grandis* KEMTALTGIGEINP----GAL-ICDFAFPCGYSMNGIDG----DRYSTIHTIPE-EGFSYASYEC  
 923724061 *Brassica napus* KEMTRLSGIDMINA---NAF-ICDFAFPCGYSMNGVDG----DRYSTIHTIPE-DGFSYASFEC  
 514802427 *Setaria italica* KEMTKLSGISEIIP----EME-ICDFEFPCGYSMNAIHG----SAFSTIHTIPE-DGFSYASYEV  
 514756085 *Setaria italica* DAMTAAASGLGVNP----RSL-AFGYAFPCGYSMNALDG----ARYATVHVTPE-DGHSYASYEV  
 926775472 *Monoraphidium neglectum* ARTTTDTGIRGLVP----GAD-IDDYVFPCGYSMNGILG----GGFTIHTIPE-DGFSYASVEV  
 159470359 *Chlamydomonas reinhardtii* ERTTKDTGIAELKP---KAI-IDDYVFPCGYSMNGIDN----TGLTIHTIPE-AHQSYASVEV  
 308810503 *Ostreococcus tauri* AQTTTDSGIRSIIFE---EFD-IDDYVFPCGYSMNGINEHGSIDQYSTIHTIPE-EGFSYASCEL  
 612398587 *Bathycoccus prasinos* EKTTTHDSGIQSIFE---SFS-IDDYVFPCGYSMNGLNEE--YSGEYSTIHTIPE-DGFSYASVEH

Activation Residues

Trypanosomatids Prozyme:

72390539 *Trypanosoma brucei* TREU927 N[4] ASDITK---ILLKFFY--PERVLLVLLQDR [13] LEGFTVVRHGANHFGGG--YVFHQATYARS  
 71408277 *Trypanosoma cruzi* CL Brener N[4] ATKKRE---LLEKFC--PDRFTMVVLQDR [13] MEGYTIMNRATNHFQGG--YAFHQTSYIRA  
 157872786 *Leishmania major* Friedlin\* NAKAAVASPT---RLLDTFQ--PTHFTVAALQDR [13] FTPYTLQNRVTNLFEGG--YAFHQLLFARS  
 154341969 *Leishmania braziliensis*\* NAKAAVTPK---RLVDTFR--PAYFTIAALQDK [13] FHAYTLQNRVTNFFEGG--YAFHQLLFARS  
 588319214 *Phytomonas\_sp.\_isolate\_EM1* N[6] SPARLE---SLLKQYK--PSKIVMFALQDR [13] LPGYALQSSLTNHFREG--YSFYQLTFVCG  
 528258165 *Angomonas\_deanei* N[6] SKTKIA---SLLLEQHQ--PARFTLIFFEDEK [12] FDSYALNHRKSVNYFGMG--YAFHQLVFEKC  
 528251074 *Strigomonas\_culicis*\* N[6] DTSKIA---ALLAAEY--PTRFTIVCLEDT [12] FEHYEQKRRTANYFGAG--YSYIHSVFERT

Trypanosomatids:

72390527 *Trypanosoma brucei* TREU927 NTC-ALNYSK---CVLRFVD--PERFSVIVFIDP [20] YPNYEAHHRVTVNEYTPG--HWVLKVNIVKVR  
 71408275 *Trypanosoma cruzi* CL Brener NTP-AVNYSE---RVLGVFA--PIRFSVIVFIDP [20] YPKYELQNRVTNVEFAPG--YVVMKMNYARR  
 157872783 *Leishmania major* Friedlin NSR-ATNYSYD---RVLGVFR--PQRFVTIVFLDP [20] YPEYSLLRHTTNEFAPG--YVAMKINYVRT  
 154341967 *Leishmania braziliensis* NSR-AANYSD---RVLGVFR--PQRFVTIVFLDP [20] YPEYRVLHRHTTNEFAPG--YVAMKINYIKT  
 588319215 *Phytomonas\_sp.\_isolate\_EM1* NCH-DANYADRIKRVLSVFR--PQRFVTIVFLDP [20] FTEYEVFNKSVNNEFTPG--YVAMKINYVRS  
 528270660 *Angomonas\_deanei* NAN-EANYFKTVLKVLDVFR--PQRFVTIVIIDP [36] EVDYCVMHRAVNEFAPG--YVAMKINYVQR  
 529494686 *Strigomonas\_culicis* NKD-ADNYFATVRNVLRFVR--PQRFVTIVVVDP [40] FIDYCVLHRVTNVEFSPG--YAMKINYIQR

protists:

831777486 *Acytostelium subglobosum* LB1 NLA-VADYNQ---LVLAVFK--PGRFTAALYCED [14] MPEFAMTNTKIHGFDGG--YDVVVCNFDRO  
 166240588 *Dictyostelium discoideum* AX4 NVA-LADYNQ---LVLNVFK--PGRFTAALYAED [14] VPSYAIQNKTVHGFDGG--YDVVVSNYQQL  
 330840910 *Dictyostelium purpureum* NIA-LPDFNQ---LVLNVFK--PGRFTAALYSED [15] IPEFSIQNKTLHGFDGG--YDVVVSNFKLS  
 470246992 *Dictyostelium fasciculatum* NIA-LPSYHI---LILKVER--PGRFTAALYAED [14] LLEHAI TNKTVHSFDG [12] FAVERYKDK  
 290984948 *Naegleria gruberi* NEG-M N[5] IENYSE---LVIHTFR--PGRFTVTLFADD [49] GDEYKLSKTFYEFTGG--YNLTFNFAKI  
 676381665 *Aureococcus anophagefferens* NTA-LKGYAS---LVLAVFK--PKKVVTLFADE [22] LGTYHRNDLSLLHVEHD--CVMMANYS LH  
 813169519 *Saprolegnia parasitica* NDM-VGAYGP---LVVGVFR--PAKFTVTMSVVG [13] FNGYKRRGGWTQAHMDGDI TVLKANFAVA  
 673049047 *Aphanomyces invadans* NDK-VGTYAP---MVLAVFR--PRKMTLTMSVLG [13] FKGYKRRGGWTQVHMDGDLI SLKANFVIV  
 675188663 *Phytophthora parasitica* NAR-LRSYAS---LVLRCFR--PAKYSVSVYTD [15] EDMVKIDDDLLYKRKG [12] CRMANYAQT  
 294883519 *Perkinsus marinus* N[7] LVEITR---RAVAVFK--PGRFSLTHVADN [12] DTDYKVKATSTYRWELD--YQASVSSVSR  
 551667574 *Guillardia theta* N[5] YHHLIA---RVLEVER--PAKFTTVEHVDA [14] LDGYDLAGRFTNEFGTKDYVQMCNIVSK

fungi:

629651635 *Eutypa lata* N[10] SEVVE---HVVDIFK--PGRFSITLFEAK [26] IKGYRRIDRIVHDFD--YELVFRFFERE  
 261202444 *Blastomyces gilchristii* N[10] SEIVE---HVVDIFK--PGRFSVTLFEAK [46] IPGYRRVDRIVHDLG--YDLVFRYERN  
 50553544 *Yarrowia lipolytica* N[10] IDVIE---KVLNVER--PGKLSVTLFEAE [13] LDGYKRTDKVLYEFDG--YQMVYVCFEAI  
 891574827 *Schizosaccharomyces cryophilus* N[10] METIE---KAVKTFG--AGNFSLTLFQAK [24] FESYKREEFIVYDFPG--YELVFASFSSV  
 6324521 *Saccharomyces cerevisiae* N[13] LDVLL---HILNVEK--PREFSMTFFTKN [15] LPDYIKLDKIVYDLDD--YHLFYMKLQKK  
 444315950 *Tetrapisispora blattae* N[12] RNMVQ---RVLDFIR--PQEFCLTLFQNT [19] VPGYVKMDHILYDLDD--YQLLYVRLHRI  
 149237635 *Lodderomyces elongisporus* N[11] LTVLT---KVLKIFR--PRKFSLTLINEI [19] EFGYKKEKAVYDLKNE--YNLLYLNFKVA  
 953449703 *Mixia osmundae* N[20] HSLVN---KVLAVFK--PARFSITLFSVR [28] QDAYTRDRIHHEFDD--YDLGFATYEHF  
 331247566 *Puccinia graminis* N[10] RNVIS---RILKTFE--PKNTTITLFSNH [26] RNLYRLGEQKDHELDD--YNLAYISLQRR  
 955498480 *Moesziomyces antarcticus* N[22] PTLVR---RVVDIFE--PGKMSVTLFVST [34] LKGYKRTDRIAYEFER--YNLVFVSFEKR  
 914974225 *Tilletiaria anomala* N[24] TSLIN---HVISTFE--PGKMSITLFSVN [36] IKGYQRTDRIAYEFER--YDLVVFVSFEKV

animals:

74275346 *Homo sapiens* NLS-QTSYDD---LVVEVFK--PGKFVTLFVNQ [13] IEGFKRLDCQSAMFND--YNFVFTSFAKK  
 936678339 *Trichogramma pretiosum* NVA-AASYGD---VVLRCFK--PGKFVVSIFANK [21] RRLDYVRDDAQYCRFKN--YDLSCAFYSKF  
 157115295 *Aedes aegypti* NVA-SSSYGD---LVLDTFQ--PGKFIVTVFANK [16] IDQWKRDRDQFSRFPT--YDLTYAQYCKY  
 24583360 *Drosophila melanogaster* NVA-LSNYRK---LVINTFK--PGKFIVTIFANK [17] GSHWKRTDMQCCNFPS--YNLLFAQYSHS  
 910327857 *Papilio xuthus* NVP-VSSYDE---VVLHAFR--PGRFVLTVFATP [16] LCGYEQKEAQYCRFSG--YELHYALYAKF  
 871243907 *Aplysia californica* NVP-Q-SYDD---LVLNVEN--PGKFLMTVFANK [16] IEGYQRMDHQFCFSFKN--YFLTYYTQFSRP  
 675851988 *Helobdella robusta* NVP-RDSYND---LVTDFIQ--PNKFIVTLMANE [14] VKFFRRTHEQACEMKN--YNLNYALYERP  
 156370797 *Nematostella vectensis* NIR-VKCYKE---LVLKAFK--PGRFLMTLFADE [15] FHGYQRWDLQLCQMKY--YNLTYGHRQV  
 761906225 *Amphimedon queenslandica* NVV-GECYKS---LVLDFIK--PGSFTLTLFANK [15] LSNYTCCLKDQISLFSI--YNLTFLHYKHN  
 198416848 *Ciona intestinalis* NVI-MKDYKE---LVLNLFQ--PQVVSMTLFAFH [16] VPGYKRLDRQVAQLQD--YSLWYSQLKKE  
 268561468 *Caenorhabditis briggsae* NQD-LVCLYS---QVLQCFR--PNKILMTVFAND [16] LPGYRRTNVQFVRLET--ETLVYAHFVRK  
 312078795 *Loa loa* NQN-TLNLSE---QVLEIFRHPVKNKFLITFTND [16] ICGCHRTNLQFLELPT--ETLVYAQFERA

protists:

929755270 *Sphaeroforma arctica* JP610 NYL-AEDYTE---LVLKTFK--PGKFVMTVFANP [15] LTGYNRTERQEYQFNK--YNLSYGHFSRD  
 514686471 *Salpingoeca rosetta* DVL-KEDYTP---MVLDFIK--PGKFSINVFANE [17] GAGFQRHDQQLCCLAH--ASVLFQGHFTSN

plants:

985701157 *Solanum tuberosum* V[8] LGPLVE---RVLACFE--PAEFSVALHADV [12] VKGYSLAEWSPEEFEGG--GSIVYQKFTRT  
 731352674 *Beta vulgaris subsp vulgaris* M[5] SIRFEP---LALRCFE--PKEFTIAVTCFG [14] VKGFTCRSAVKQELPGG--GFVIYKTYVAQ  
 302803606 *Selaginella moellendorffii* M[5] KTGLNA---LVVRCFK--PGFVSVCVHAAP [24] PVAYATCSGSHKEELPGG--SAVVYHTFVLA  
 168048070 *Physcomitrella patens* M[5] QVELGA---LVVGVFK--PAAFAMSVDVSG [18] PRGYVCNGSSRQELASG--SAVVYHTFQEA  
 702445187 *Eucalyptus grandis* V[6] GDDIAR---MVAWVER--PGAMSVSVTSGS [12] PLGLKRRSCATDQFPEA--GTVVVFQSFRTAR  
 923724061 *Brassica napus* G[7] QGDIAE---VAIDVFR--PGCVSIATTYNG [17] KLGLKCRSRLMDEFPGS--GTVVYQSFRTPR  
 514802427 *Setaria italica* M[5] ALAYGD---LVLRCFG--PSEFSVAVTIFG [13] AEVYDCNNMVEQELPG--GVLIYQSFVST  
 514756085 *Setaria italica* G[3] AGCALA---SAIAVFR--PATVSVSVCYDG [20] PMGLACRSRAAEAFPGA--TTVYQTFTRT  
 926775472 *Monoraphidium neglectum* T[5] AFCPAD---MIAATFR--PGLSASLSVDA [15] PPGYGVQSATAQELATG--GRVSYTTFGPD  
 159470359 *Chlamydomonas reinhardtii* S[6] MAPVQE---LVVKIFA--PGKVSVTMSVDK [15] PAGFGLQGASSQVSPCG--GKVAYYTLIEK  
 308810503 *Ostreococcus tauri* S[5] DLDAFA---YVANVFK--PGKMIFAISVDG [16] IPGYTRVQATRQEFDVE--GVVAYYTFYEHN  
 612398587 *Bathycoccus prasinos* S[8] AFSVSN---FCANVFK--PGKMTFAVTCHG [22] GETYSRPSMCFQQLPKDQGFVAYLTFVKT
